# Supplementary material for: A Tale of Two Waves: Changes in the Use of Noninvasive Ventilation and Prone Positioning in Critical Care Management of Coronavirus Disease 2019
Source: PubMed Central journal article supplement — Crit Care Explor. 2021 Dec 3;3(12):e0587. doi: 10.1097/CCE.0000000000000587 (PMC8647894; doi:10.1097/cce.0000000000000587), 2021-12-03
Supplement: cc9-3-e0587-s001.pdf [file cc9-3-e0587-s001.pdf]

## SUPPLEMENTARY DIGITAL CONTENT

### **A tale of two waves: changes in the use of non-invasive ventilation and prone positioning in critical care management of COVID-19.**

|             |                                                                                                  |
|-------------|--------------------------------------------------------------------------------------------------|
| Appendix 1: | Example Standard of Care Guidelines                                                              |
| Appendix 2: | Baseline Characteristics and Pre-ICU Care Stratified by Survival                                 |
| Appendix 3: | ICU Care Stratified by Survival                                                                  |
| Appendix 4: | Ventilatory Parameters                                                                           |
| Appendix 5: | FiO <sub>2</sub> Response to Proning at 12 hours stratified by wave and survival in IMV Patients |
| Appendix 6: | Exploratory Analysis of Patients with high BMI $\geq 35\text{kg/m}^2$                            |

# Appendix 1 – Example Standard of Care Guidelines

Example of 1 Page from an ICU Covid-19 Guideline at the start of the pandemic (March 2020)

| Daily Reviews for the ICU Patient with suspected/confirmed Covid-19                |                                                                                                                                                                                                                                                                                                                                                                                                                                                                                                                                                                                                                                                                                                                                                                                                                                                                                                                                                                                                                                                                                                                                                                                                                                                                                                                                                                                                                                                                                                                                                                                                                                                                                                                                                                                                                                                           |
|------------------------------------------------------------------------------------|-----------------------------------------------------------------------------------------------------------------------------------------------------------------------------------------------------------------------------------------------------------------------------------------------------------------------------------------------------------------------------------------------------------------------------------------------------------------------------------------------------------------------------------------------------------------------------------------------------------------------------------------------------------------------------------------------------------------------------------------------------------------------------------------------------------------------------------------------------------------------------------------------------------------------------------------------------------------------------------------------------------------------------------------------------------------------------------------------------------------------------------------------------------------------------------------------------------------------------------------------------------------------------------------------------------------------------------------------------------------------------------------------------------------------------------------------------------------------------------------------------------------------------------------------------------------------------------------------------------------------------------------------------------------------------------------------------------------------------------------------------------------------------------------------------------------------------------------------------------|
|  |                                                                                                                                                                                                                                                                                                                                                                                                                                                                                                                                                                                                                                                                                                                                                                                                                                                                                                                                                                                                                                                                                                                                                                                                                                                                                                                                                                                                                                                                                                                                                                                                                                                                                                                                                                                                                                                           |
| <b>Airway</b>                                                                      | <p>Check and record tube size and position (especially after proning/deproning)<br/>Is there a cuff leak? Check cuff pressure (usually kept at 30cmH<sub>2</sub>O)</p>                                                                                                                                                                                                                                                                                                                                                                                                                                                                                                                                                                                                                                                                                                                                                                                                                                                                                                                                                                                                                                                                                                                                                                                                                                                                                                                                                                                                                                                                                                                                                                                                                                                                                    |
| <b>Breathing</b>                                                                   | <p>Physical examination balancing the risks of staff exposure: visual assessment first, with percussio/palpation/auscultation if patient deteriorating or clinical concern.</p> <p>Ask the nursing staff about secretions: amount, quality.</p> <p>Mechanical ventilation:</p> <ul style="list-style-type: none"> <li>- SIMV VC+ is our standard mandatory mode. RR 20/min initially.</li> <li>- Target oxygen saturations: 90% in acute respiratory failure.</li> <li>- Check SpO<sub>2</sub> alarm settings: lower limit 87%, upper limit 98%.</li> <li>- Tidal volume: aim 6ml/kg <u>ideal body weight</u> in controlled ventilation (see overleaf)</li> <li>- Is the height and ideal body weight accurately recorded? Don't assume – check!</li> <li>- I:E ratio (normal is 1:2, start at 1:1.5, progress to 1:1 or inverse ratio in severe hypoxia)</li> <li>- Assess static compliance, PEEPi, plateau and driving pressure.</li> <li>- Record the PaO<sub>2</sub>/FiO<sub>2</sub> ratio (&lt;40 = mild, &lt;26.7 = moderate, &lt;13.3 = severe)</li> <li>- Is the patient recruitable? Does static compliance increase with increasing PEEP?</li> <li>- If recruitable: use the PEEP ladder (see overleaf), if not: set PEEP 8-10.</li> </ul> <p>Investigations: trends in ABGs and pH, when was the last CXR?</p> <p style="text-align: center;"><b>SEE TOP TIPS FOR COVID-19 IN ICU FOR WHEN TO PARALYSE &amp; WHEN TO PRONE</b></p> <p>Muscle relaxants: record duration of infusion/boluses and when last given</p> <p>If prone:</p> <ul style="list-style-type: none"> <li>- Review duration of prone ventilation, record dates/times of prone episodes</li> <li>- Plan position changes and note time for re-supination</li> </ul> <p style="text-align: center;"><b>SEE EMERGENCY GUIDELINE FOR MANAGEMENT OF SEVERE ACUTE HYPOXIA</b></p> |
| <b>Circulation</b>                                                                 | <p>Review 3 lead ECG – are there arrhythmias/ectopics? 12 lead only if good indication.<br/>Assess volume status and fluid overload, review lactate and CVP.<br/>Physical exam if patient deteriorating or clinical concern.</p> <p>Review of investigations:</p> <ul style="list-style-type: none"> <li>- Troponin measurements with routine bloods (risk of myocarditis in Covid-19)</li> <li>- BNP (if concerns for heart failure) – check on admission for all patients.</li> </ul> <p>Consider echocardiography – to assess fluid status and/or if Troponin/BNP elevated.</p> <p>Management of shock:</p> <ol style="list-style-type: none"> <li>1. Consider the cause (SHIT):             <ol style="list-style-type: none"> <li>a. Septic</li> <li>b. Hypovolaemic</li> <li>c. Iatrogenic (eg. sedation bolus/interruption of vasopressor)</li> <li>d. Thoracic (eg. cardiogenic, tension pneumothorax, PE)</li> </ol> </li> <li>2. Caution with fluid bolus therapy – wet lungs worsen ventilatory failure. Consider assessing fluid responsiveness <u>first</u>: tidal vol challenge or passive leg raising.</li> <li>3. Target MAP 60-65mmHg provided UO acceptable (see below)</li> <li>4. Noradrenaline 1<sup>st</sup> choice vasopressor: (4mg/50mls -&gt; 8mg/50mls -&gt; 16mg/50mls)</li> <li>5. Other vasopressors/inotropes after discussion with critical care consultant</li> <li>6. <u>Do not</u> give hydrocortisone as a treatment for septic shock</li> </ol>                                                                                                                                                                                                                                                                                                                                                                      |

## Appendix 2. Baseline Characteristics and Pre-ICU Care Stratified by Survival

|                                                        | All<br>(N=210)   | ICU Survivors<br>(n=135) | ICU Non-Survivors<br>(n=75) | P value |
|--------------------------------------------------------|------------------|--------------------------|-----------------------------|---------|
| Age, (years), mean (SD)                                | 57.6 (13.8)      | 53.9 (13.3)              | 64.1 (12.2)                 | <0.01   |
| Male sex, n (%)                                        | 139 (66.2%)      | 93 (68.9%)               | 46 (61%)                    | 0.29    |
| Female sex, n(%)                                       | 71 (33.8%)       | 42 (31.1%)               | 29 (39%)                    |         |
| Body mass index (kg/m <sup>2</sup> ), n (%)            |                  |                          |                             |         |
| <18.5                                                  | 1 (0.48%)        | 1 (0.7%)                 | 0 (0%)                      |         |
| 18.5 - 25                                              | 44 (21.0%)       | 26 (19.3%)               | 18 (24%)                    |         |
| 25 - 30                                                | 78 (37.1%)       | 48 (35.6%)               | 30 (40%)                    | 0.71    |
| 30 - 35                                                | 61 (29.0%)       | 43 (31.9%)               | 18 (24%)                    |         |
| 35+                                                    | 18 (8.6%)        | 12 (8.9%)                | 6 (8%)                      |         |
| Pre-hospital dependency, n (%):                        |                  |                          |                             |         |
| Able to live without assistance in daily activities    | 162 (77.1%)      | 110 (81.5%)              | 52 (69%)                    |         |
| Minor assistance with some daily activities            | 27 (12.9%)       | 14 (10.4%)               | 13 (17%)                    | 0.14    |
| Major assistance with majority of/all daily activities | 21 (10.0%)       | 11 (8.1%)                | 10 (13%)                    |         |
| <b>Pre-ICU care</b>                                    |                  |                          |                             |         |
| APACHE II, median [IQR]                                | 15 [8, 22]       | 13 [6.5, 19.5]           | 18 [11, 25]                 | <0.01   |
| APACHE II probability of death (%), median [IQR]       | 22.6 [2.7, 42.5] | 17.9 [5, 30.8]           | 31.2 [5.9, 56.4]            | <0.01   |
| Airway on arrival to ICU, n (%):                       |                  |                          |                             |         |
| Own Airway                                             | 165 (78.6%)      | 102 (75.6%)              | 63 (84%)                    |         |
| Endo-tracheal tube                                     | 41 (19.5%)       | 29 (21.5%)               | 12 (16%)                    | 0.23    |
| Tracheostomy                                           | 4 (1.9%)         | 4 (3.0%)                 | 0 (0%)                      |         |
| Treatment limitation at ICU admission, n (%)           | 40 (19.0%)       | 10 (7.4%)                | 30 (40%)                    | <0.01   |

APACHE = acute physiology and chronic health evaluation

## Appendix 3- ICU Care Stratified by Survival

| <b>Maintained own airway for entire ICU admission</b> | <b>All<br/>(N=100)</b> | <b>ICU Survivors<br/>(n=66)</b> | <b>ICU Non-Survivors<br/>(n=44)</b> | <b>P value</b> |
|-------------------------------------------------------|------------------------|---------------------------------|-------------------------------------|----------------|
| NIV/HF during ICU admission, n (%)                    | 86 (86%)               | 56 (85%)                        | 30 (68%)                            | 0.06           |
| With treatment limitation                             | 32 (32%)               | 8 (12%)                         | 24 (55%)                            | <0.01          |
| Without treatment limitation                          | 54 (54%)               | 48 (73%)                        | 6 (14%)                             |                |
| Duration of NIV (hours), mean (SD)                    | 91 (73)                | 91 (58)                         | 90 (95)                             | 0.96           |

| <b>Management of patients requiring invasive ventilation</b>         | <b>All<br/>(N=106)</b> | <b>ICU Survivors<br/>(n=65)</b> | <b>ICU Non-Survivors<br/>(n=41)</b> | <b>P value</b> |
|----------------------------------------------------------------------|------------------------|---------------------------------|-------------------------------------|----------------|
| Intubated prior to ICU admission, n (%)                              | 41 (38.7%)             | 29 (45%)                        | 12 (29%)                            | 0.15           |
| Intubated during ICU admission, n (%)                                | 65 (61.3%)             | 36 (55%)                        | 29 (71%)                            |                |
| Total intubated ≤ 24 hours of ICU admission, n (%)                   | 74 (69.8%)             | 54 (83%)                        | 20 (49%)                            | <0.01          |
| Total intubated >24 hours of ICU admission, n (%)                    | 32 (30.2%)             | 11 (17%)                        | 21 (51%)                            |                |
| NIV prior to intubation, n (%)                                       | 57 (53.8%)             | 31 (48%)                        | 26 (63%)                            | 0.72           |
| With treatment limitation initially in place on admission            | 2 (1.9%)               | 0 (0%)                          | 2 (5%)                              | -              |
| Without treatment limitation in place on admission                   | 55 (51.9%)             | 31 (48%)                        | 24 (59%)                            | -              |
| NIV duration prior to intubation (hours), median [IQR],              | 19 [7, 61]             | 10 [4, 21]                      | 50 [23, 124]                        | <0.01          |
| Time to intubation if own airway on admission (hours), median [IQR], | 24 [12, 65]            | 19 [10, 46]                     | 41 [17, 124]                        | 0.01           |
| Neuromuscular blockade Infusion, n (%)                               | 77(72.6%)              | 44 (68%)                        | 33 (80%)                            | 0.52           |
| Cumulative duration per patient (hours), median [IQR]                | 111 [46, 185]          | 96 [45, 163]                    | 139 [52, 230]                       | 0.12           |
| Prone Ventilation, n (%)                                             | 58 (54.7%)             | 28 (43%)                        | 30 (73%)                            | <0.01          |
| Duration of each episode (hours), median [IQR]                       | 19 [15, 23]            | 19 [16, 22]                     | 19 [14, 23]                         | 0.97           |
| Cumulative duration per patient (hours), median [IQR]                | 43 [22, 76]            | 34 [22, 60]                     | 63 [24, 93]                         | 0.11           |
| Number of episodes per patient, median [IQR]                         | 2 [1, 5]               | 2 [1, 4]                        | 3 [1, 6]                            | 0.19           |
| Time from Intubation to first pronation, (hours), median [IQR]       | 41 [5, 111]            | 42 [5, 156]                     | 34 [5, 89]                          | 0.74           |
| Inhaled nitric oxide therapy at any point, n (%)                     | 6 (5.7%)               | 2 (3%)                          | 4 (10%)                             | -              |
| Transferred for Extracorporeal membrane oxygenation, n (%)           | 3 (2.8%)               | 3 (5%)                          | 0 (0%)                              | -              |
| Successful extubation, n (%)                                         | 28 (26.4%)             | 28 (43%)                        | 0 (0%)                              | -              |
| Overall duration of invasive ventilation (days), mean (SD)           | 20.7 (19.6)            | 24.2 (23.0)                     | 15.0 (10.5)                         | <0.01          |

| <b>Tracheostomy management</b>                    | <b>All<br/>(N=39)</b> | <b>ICU Survivors<br/>(n=32)</b> | <b>ICU Non-Survivors<br/>(n=7)</b> | <b>P Value</b> |
|---------------------------------------------------|-----------------------|---------------------------------|------------------------------------|----------------|
| Failed extubation before tracheostomy, n (%)      | 10 (26)               | 9 (28)                          | 1 (14)                             | -              |
| Day of ICU admission performed, mean (SD)         | 19.7 (.1)             | 20.5 (9.1)                      | 16.3 (8.9)                         | 0.29           |
| Successful decannulation, n (%)                   | 30 (77)               | 30 (94)                         | 0 (0)                              | -              |
| Days to decannulation after insertion, mean (SD), | 21.9 (16.5)           | 21.9 (16.5)                     | -                                  | -              |

NIV= Non-Invasive Ventilation, HF= High Flow Oxygen

## Appendix 4 - Ventilatory Parameters

Exploratory analysis undertaken at Day 1, 5 and 10 post intubation. All Values based on the mean of lowest PF per patient using available patient data for each calendar day.

|                                                                  | All Patients | Wave 1     | Wave 2     |
|------------------------------------------------------------------|--------------|------------|------------|
| Positive End Expiratory Pressure (cmH <sub>2</sub> O), mean (SD) |              |            |            |
| Day 1                                                            | 11.3 (2.4)   | 11.6 (2.6) | 10.9 (1.7) |
| Day 5                                                            | 10.5 (2.3)   | 10.6 (2.3) | 10.5 (2.3) |
| Day 10                                                           | 9.9 (2.6)    | 9.6 (2.6)  | 10.4 (2.4) |
| Peak Airway Pressures (cmH <sub>2</sub> O), mean (SD)            |              |            |            |
| Day 1                                                            | 26.8 (4.7)   | 26.8 (4.3) | 27.0 (5.4) |
| Day 5                                                            | 26.5 (4.8)   | 26.1 (4.2) | 27.2 (5.8) |
| Day 10                                                           | 26.1 (6.5)   | 24.2 (6.5) | 29.2 (5.2) |
| Actual Respiratory Rate, mean (SD)                               |              |            |            |
| Day 1                                                            | 22.7 (3.3)   | 22.9 (3.2) | 22.4 (3.4) |
| Day 5                                                            | 24.2 (3.9)   | 24.0 (4.1) | 24.4 (3.8) |
| Day 10                                                           | 24.0 (4.1)   | 23.1 (3.8) | 25.2 (3.8) |
| Tidal Volume (ml/Kg/IBW), mean (SD)                              |              |            |            |
| Day 1                                                            | 7.0 (1.2)    | 7.0 (1.2)  | 7.1 (1.3)  |
| Day 5                                                            | 7.0 (1.5)    | 7.1 (1.6)  | 7.0 (1.3)  |
| Day 10                                                           | 7.1 (1.7)    | 7.4 (1.6)  | 6.6 (1.7)  |
| PaO <sub>2</sub> /FiO <sub>2</sub> Ratios (mmHg), mean (SD)      |              |            |            |
| Day 1                                                            | 137 (56)     | 142 (55)   | 131 (57)   |
| Day 5                                                            | 129 (54)     | 138 (60)   | 124 (51)   |
| Day 10                                                           | 147 (74)     | 168 (74)   | 119 (65)   |

PaO<sub>2</sub> = Partial Pressure of Oxygen in arterial blood.

FiO<sub>2</sub> = Fraction of Inspired Oxygen

Calculated as the mean of the lowest PaO<sub>2</sub>/FiO<sub>2</sub> Ratio per Patient per calendar day

IBW = Ideal Body Weight (Devine's formula)

## Appendix 5 - FiO<sub>2</sub> Response to Proning at 12 hours stratified by wave and survival in IMV Patients

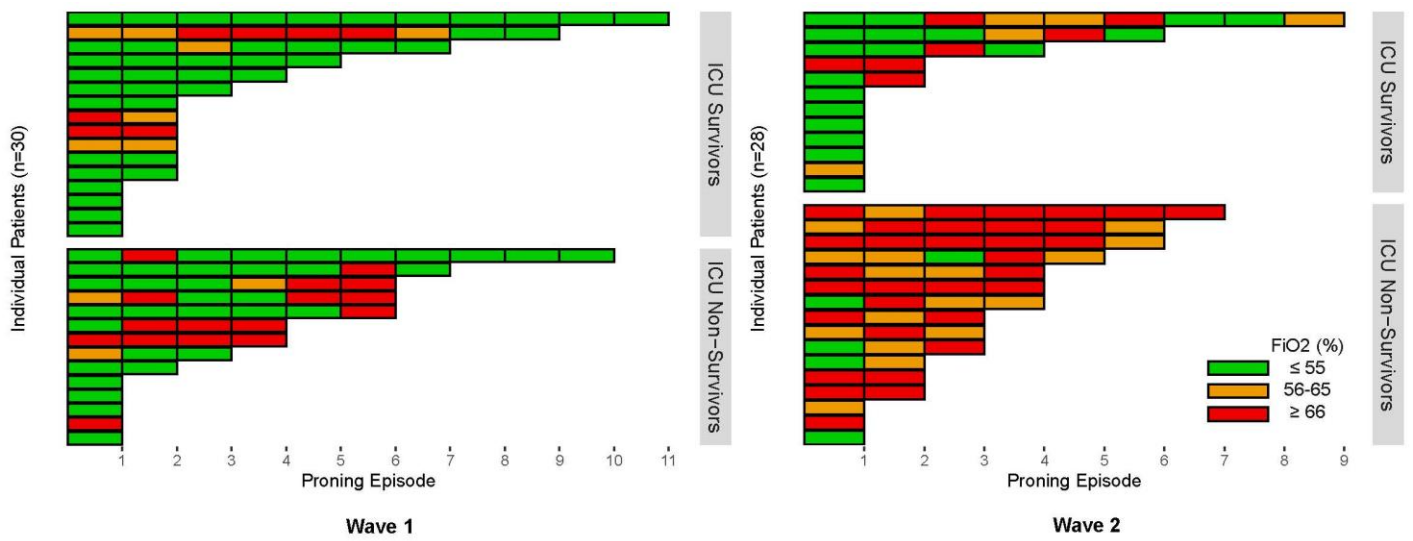

Graphical illustration of the outcome of each proning episode for all patients in the study. Individual patients are arranged on the y-axis according to ICU survival status and the number of the proning episodes they received. Each block represents a proning episode and the blocks are arranged sequentially in time for each patient. The blocks are colour coded according to the FiO<sub>2</sub> outcome observed 12 hours after proning was commenced (see manuscript).

## Appendix 6 - Exploratory Analysis of Patients with high BMI $\geq 35\text{kg/m}^2$

|                                                            | BMI < 35 | BMI $\geq 35$ | p value |
|------------------------------------------------------------|----------|---------------|---------|
| Proportion of Patients requiring Intubation, n, (%)        | 85 (51%) | 21 (47%)      | 0.61    |
| Proportion of Patients requiring Tracheostomy, n, (%)      | 29 (17%) | 10 (23%)      | 0.52    |
| Total duration of Mechanical Ventilation, days, mean, (SD) | 20.4     | 21.8          | 0.75    |

Subgroup exploratory analysis. Examining whether patients with a very high BMI ( $\geq 35\text{kg/m}^2$ ) were more likely to require intubation, tracheostomy or a longer duration of invasive mechanical ventilation.
